# Supplementary material for: Advanced Farming Strategies Using NASA POWER Data in Peanut-Producing Regions without Surface Meteorological Stations
Source: MDPI journal article supplement (doi:10.3390/agriengineering6010027), 2024-02-20
Supplement: s1 [file s1]

### Supplementary Materials:

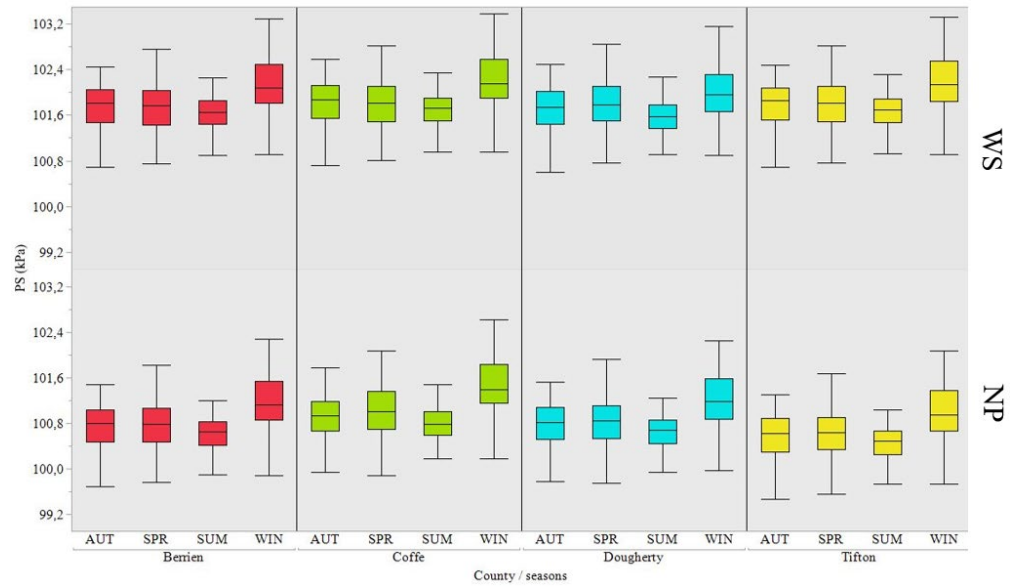

**Figure S1.** WS: surface weather station; NP: NASA-POWER. Seasons of the year AUT: autumn; SPR: spring; SUM: summer; WIN: winter. PS: surface pressure (kPa).

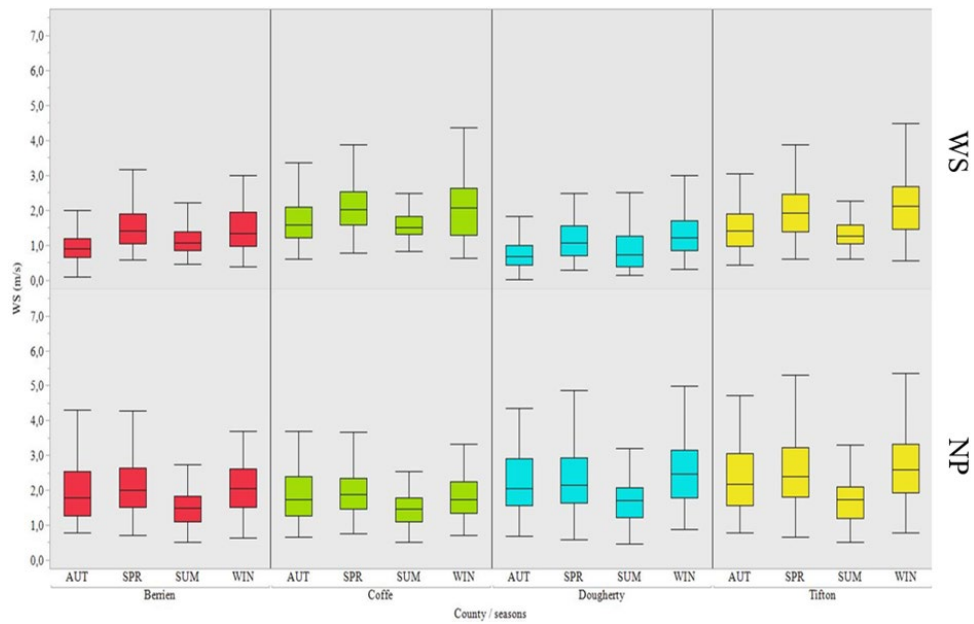

**Figure S2.** WS: surface weather station; NP: NASA-POWER. Seasons of the year AUT: autumn; SPR: spring; SUM: summer; WIN: winter. WS: wind speed ( $\text{m s}^{-1}$ ).

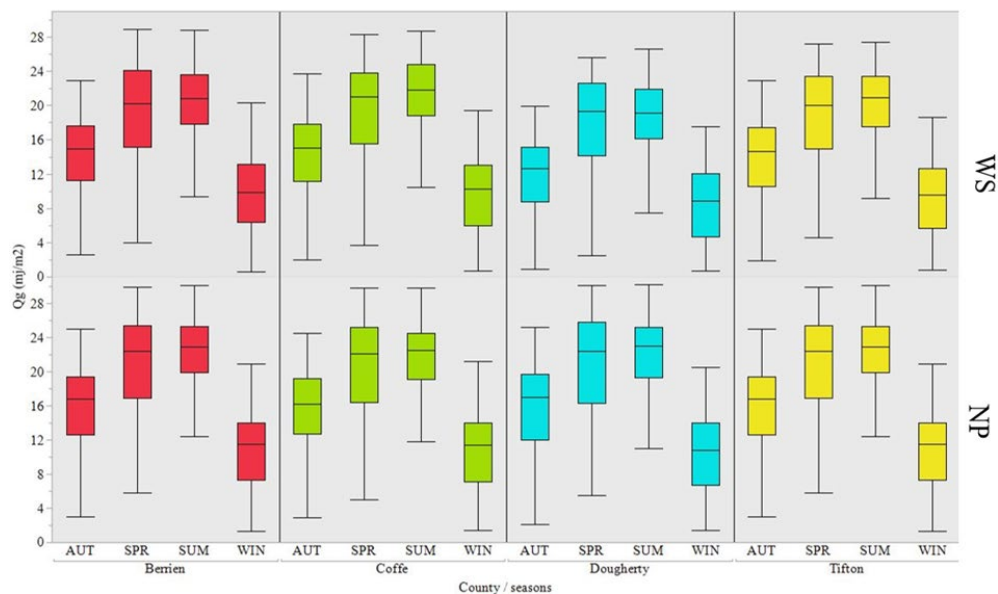

**Figure S3.** WS: surface weather station; NP: NASA-POWER. Seasons of the year AUT: autumn; SPR: spring; SUM: summer; WIN: winter.  $Q_g$ : solar radiation ( $\text{MJ m}^{-2} \text{dia}^{-1}$ ).

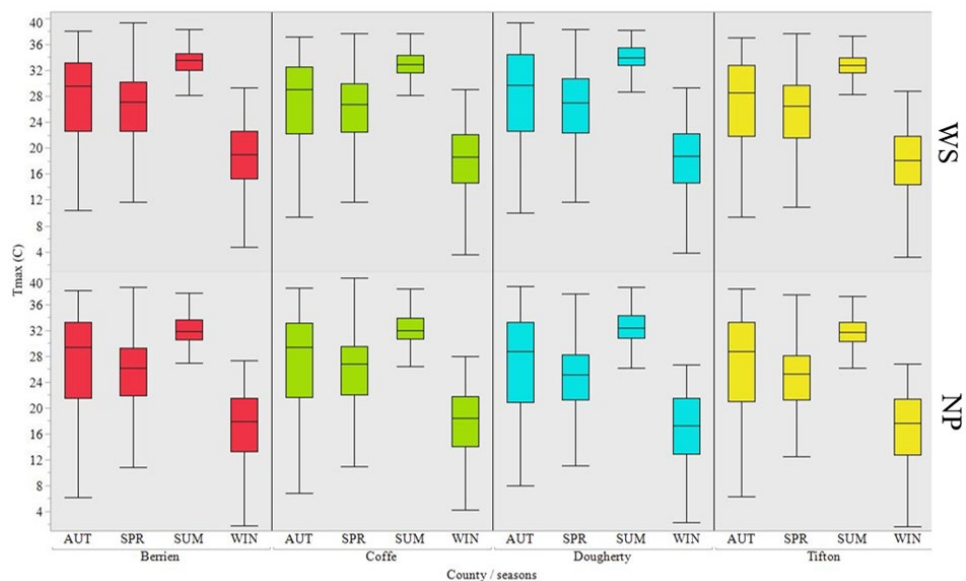

**Figure S4.** WS: surface weather station; NP: NASA-POWER. Seasons of the year AUT: autumn; SPR: spring; SUM: summer; WIN: winter.  $T_{\text{max}}$ : maximum temperature ( $^{\circ}\text{C}$ ).

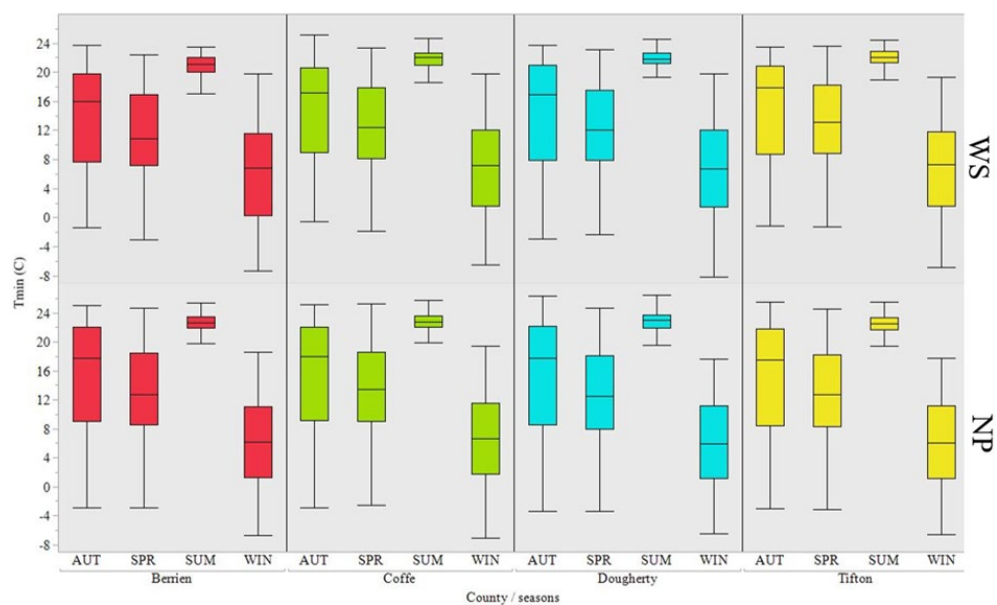

**Figure S5.** WS: surface weather station; NP: NASA-POWER. Seasons of the year AUT: autumn; SPR: spring; SUM: summer; WIN: winter. Tmin: minimum temperature (°C).

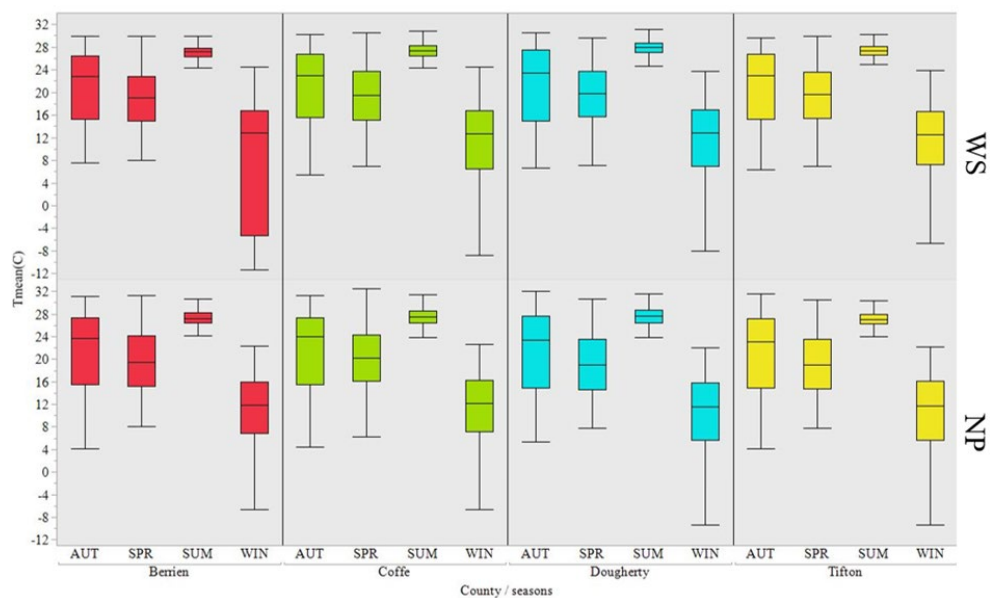

**Figure S6.** WS: surface weather station; NP: NASA-POWER. Seasons of the year AUT: autumn; SPR: spring; SUM: summer; WIN: winter. Tmean: mean temperature (°C).
